**Anti-inflammatory Activity of Lefamulin in a  
Lipopolysaccharide-Induced Lung Neutrophilia Model**

*Running Title:* Anti-inflammatory Activity of Lefamulin

*Authors:* Michael Hafner,<sup>a</sup> Susanne Paukner,<sup>a</sup> Wolfgang W. Wicha,<sup>a</sup> Boška Hrvačić,<sup>b</sup>  
Steven P. Gelone<sup>c#</sup>

*Affiliations:* <sup>a</sup>Nabriva Therapeutics GmbH, Vienna, Austria

<sup>b</sup>Fidelta Ltd, Zagreb, Croatia

<sup>c</sup>Nabriva Therapeutics US, Inc., King of Prussia, PA, USA

*Correspondence to:* Steven P. Gelone, PharmD; E-mail: Steve.Gelone@Nabriva.com

## 13    **ABSTRACT**

14    Lefamulin is a novel pleuromutilin antibiotic approved for the treatment of community-  
 15    acquired bacterial pneumonia. This study demonstrated anti-inflammatory activity of  
 16    lefamulin in a murine lipopolysaccharide-induced lung neutrophilia model. Pretreatment  
 17    of mice at clinically relevant lefamulin subcutaneous doses (35, 70, 140 mg/kg [free  
 18    base]) followed by intranasal lipopolysaccharide challenge (5 µg/50 µL/mouse)  
 19    demonstrated significant, dose-dependent reductions in total and neutrophil cell counts in  
 20    bronchoalveolar lavage fluid samples, with reductions comparable to oral dexamethasone  
 21    (0.5 mg/kg) pretreatment.

22

23    **KEYWORDS** acute lung injury, acute respiratory distress syndrome, antibiotic, anti-  
 24    inflammatory activity, dexamethasone, immunomodulatory activity, lefamulin,  
 25    lipopolysaccharide, pleuromutilin, pneumonia

Anti-inflammatory and immunomodulatory activities have been observed with various antibiotics, including macrolides, tetracyclines, and sulfonamides, which has resulted in their use in the treatment of chronic inflammatory pulmonary disorders (1). Acute lung injury (ALI) and its most severe form, acute respiratory distress syndrome (ARDS), cause inflammatory damage to the alveolar capillary membrane and excessive uncontrolled pulmonary inflammation (2). ALI/ARDS complicate pneumonia and contribute substantially to morbidity and mortality in these patients (2-4). Lipopolysaccharide (LPS) administration can induce pathologic and biological changes similar to those seen in ARDS, including neutrophilic infiltration and increased intrapulmonary cytokines, which have been extensively studied in ALI experimental models (5). Further, research has suggested that increased neutrophil recruitment to the lungs may contribute to tissue damage, particularly in chronic diseases (6).

Pleuromutilin antibiotics inhibit bacterial protein synthesis by binding to the peptidyl transferase center of the 50S ribosomal subunit (7), and lefamulin is the first pleuromutilin antibiotic approved for intravenous and oral use in humans (8). Lefamulin has demonstrated potent *in vitro* activity against the pathogens that most commonly cause community-acquired bacterial pneumonia (CABP) (9-12) and based on the results of two phase 3 clinical trials (13,14), is approved in the United States and has received a positive opinion from the Committee for Medicinal Products for Human Use in the EU for the treatment of adults with CABP (8). The current study evaluated the anti-inflammatory effects of lefamulin in a murine LPS-induced lung neutrophilia model.

**Animals.** Six-week-old male BALB/c mice (Charles River, Calco, Italy) were singly housed in a temperature-controlled (22°C ± 2°C) environment with a 12:12-hour light:dark cycle and free access to food and water. Mice were given ≥7 days for acclimation before all procedures. One day before the start of experimental procedures, all animals were randomized into six groups (*n*=8/group). All animal experiments were conducted according to European Union directive 2010/63/EU and national legislation

(Official Gazette 55/13) regulating use of laboratory animals in scientific research, with oversight from an Institutional Committee on Animal Research Ethics (CARE-Zg).

**Reagents.** LPS lyophilized powder (2 mg; Sigma, Munich, Germany) from *Escherichia coli* (O111:B4) was dissolved in 10 mL cold saline (0.9%), vortexed, and further diluted by mixing 2 mL of this solution with 2 mL saline to reach a final concentration of 5 µg LPS/50 µL saline. Dexamethasone (Sigma) was dissolved in carboxymethylcellulose (0.5% in water) and dosed in a volume of 10 mL/kg per mouse. Lefamulin (BC-3781.Ac; Nabriva Therapeutics, Vienna, Austria) was weighed using a correction factor of 1.12 and dissolved in saline. For the three dose groups (free base: 35, 70, and 140 mg/kg), corresponding lefamulin concentrations were 3.92, 7.84, and 15.68 mg/mL (free base: 3.5, 7.0, and 14.0 mg/mL), respectively. Lefamulin was dosed in a volume of 10 mL/kg per mouse. Ketamine hydrochloride (Narketan 10) was acquired from Vetoquinol (Bern, Switzerland) and xylazine hydrochloride (Rompun, 2%) was acquired from Bayer (Leverkusen, Germany).

**Induction of Lung Neutrophilia and Treatments.** Dexamethasone (0.5 mg/kg) was administered orally 1 hour before the LPS challenge. Vehicle and lefamulin were administered subcutaneously (SC) 30 minutes before the LPS challenge. Immediately before the LPS challenge, mice were anesthetized via intraperitoneal (IP) injection of ketamine (2 mg/mouse) and xylazine (0.08 mg/mouse). To induce pulmonary neutrophilia, mice in the control group received 50 µL saline and all other animals received 5 µg LPS/50 µL saline intranasally.

**Bronchoalveolar Lavage Fluid Collection and Analysis.** Approximately 4 hours after LPS administration, mice were euthanized by an overdose of IP ketamine (200 mg/kg) and xylazine (16 mg/kg). Tracheostomy was performed and a Buster cat catheter (1.0 x 130 mm; Kruuse, Langeskov, Denmark), shortened to 3 cm, was clamped into the trachea. The lungs were washed three times with cold phosphate buffered saline (PBS) in a total volume of 1 mL (0.4, 0.3, and 0.3 mL). The collected bronchoalveolar lavage fluid (BALF) samples were centrifuged at 3500 rpm for 5 minutes at 4°C, and

resulting cell pellets were each resuspended in 600  $\mu$ L PBS. Samples were immediately analyzed for total and differential neutrophil cell counts via automated hematology analyzer (XT-2000iV; Sysmex, Kobe, Japan).

**Statistical Analyses.** Statistical analyses were performed using GraphPad Prism v5.04 (GraphPad Software, Inc., La Jolla, CA, USA). Between-group differences were determined using the Mann-Whitney test and were considered statistically significant when  $P < 0.05$ .

To our knowledge, this is the first study to investigate the anti-inflammatory activity of lefamulin. In this mouse model of lung neutrophilia, pretreatment with lefamulin at doses of 35, 70, and 140 mg/kg SC 30 minutes before intranasal LPS challenge was associated with almost complete reduction in total cell and neutrophil recruitment to the lungs at 4 hours post challenge compared with the vehicle control group (no treatment, **Figure**). Compared with dexamethasone (0.5 mg/kg), a known potent anti-inflammatory glucocorticoid, lefamulin demonstrated similar reductions in BALF total cell and neutrophil counts, even at the lowest dose (35 mg/kg). Inhibition of neutrophilic lung infiltration may be beneficial during the early phase of ARDS, which is characterized by disruption of alveolar epithelial and endothelial barriers as well as widespread neutrophilic alveolitis, leading to formation of protein-rich edema in interstitium and alveolar spaces (2,15).

Maximum plasma concentrations of 1.7 and 2.5 mg/L have been achieved in healthy mice treated with single 35 and 70 mg/kg SC lefamulin doses, respectively, and a concentration of 2.5 mg/L was achieved in healthy subjects treated with a single 150 mg intravenous lefamulin dose (16,17). Because this corresponds to the approved clinical dose (150 mg intravenous/600 mg oral) in patients with CABP (8,18), these data indicate that lefamulin anti-inflammatory activity is seen with a plasma exposure that is lower than the corresponding antimicrobial clinical dose.

In earlier investigations, the veterinary pleuromutilin antibiotic valnemulin showed *in vitro* and *in vivo* anti-inflammatory effects (19,20). LPS-induced pulmonary edema, accumulation of inflammatory cells in BALF (eg, neutrophils and macrophages), and increased inflammatory cytokines (eg, tumor necrosis factor-alpha [TNF $\alpha$ ] and interleukin-6 [IL-6]) were significantly attenuated in mice pretreated with valnemulin or dexamethasone compared with no-treatment control group, with histologic analysis suggesting a protective effect from valnemulin on LPS-induced ALI (19). Valnemulin treatment in murine macrophages also significantly inhibited LPS-induced production of inflammatory mediators, including nitric oxide, prostaglandin E<sub>2</sub>, TNF- $\alpha$ , and IL-6 (20). Likewise, significantly reduced TNF $\alpha$ , IL-6, and monocyte chemoattractant protein-1 serum levels were observed in a methicillin-resistant *Staphylococcus aureus* wound infection mouse model following treatment with amphenmulin, a pleuromutilin derivative currently in development for veterinary use (21); due to the model used, however, further studies are needed to determine if these effects were the direct result of anti-inflammatory activity, an indirect consequence of antimicrobial activity, or both.

Taken together with the data presented herein, these results suggest that lefamulin has anti-inflammatory properties similar to those of macrolide antibiotics, which are currently used as anti-inflammatory therapy for pulmonary disorders (22). Like macrolides, lefamulin inhibits bacterial protein synthesis and demonstrates excellent tissue penetration, accumulation in macrophages, and immunomodulatory effects (eg, macrophage activation, neutrophilic inflammation inhibition) (8,16,22,23). Moreover, azithromycin or clarithromycin pretreatment in LPS-induced ALI similarly resulted in significantly reduced neutrophil recruitment (24). Further research on the anti-inflammatory and immunomodulatory properties of lefamulin and its potential as a treatment for inflammatory lung diseases is warranted.

**Acknowledgments**

This research was funded by Nabriva Therapeutics, King of Prussia, PA, USA. Editorial and medical writing support for manuscript development was provided by Lauriaselle Afanador, PhD, Michael S. McNamara, MS, and Morgan C. Hill, PhD, employees of ICON (North Wales, PA, USA), and funded by Nabriva Therapeutics.

**Disclosures**

Michael Hafner, Susanne Paukner, Wolfgang W. Wicha, and Steven P. Gelone are employees of/stockholders in Nabriva Therapeutics plc (Dublin, Ireland). Boška Hrvačić is an employee of Fidelta (Zagreb, Croatia), which was contracted by Nabriva to conduct the study described in this report.

145   **REFERENCES**

146   1.     Sadarangani SP, Estes LL, Steckelberg JM. 2015. Non-anti-infective effects of  
147         antimicrobials and their clinical applications: a review. Mayo Clin Proc 90:109-127.

148   2.     Matthay MA, Zemans RL. 2011. The acute respiratory distress syndrome: pathogenesis  
149         and treatment. Annu Rev Pathol 6:147-163.

150   3.     Bauer TT, Ewig S, Rodloff AC, Müller EE. 2006. Acute respiratory distress syndrome  
151         and pneumonia: a comprehensive review of clinical data. Clin Infect Dis 43:748-756.

152   4.     Kojicic M, Li G, Hanson AC, Lee KM, Thakur L, Vedre J, Ahmed A, Baddour LM, Ryu  
153         JH, Gajic O. 2012. Risk factors for the development of acute lung injury in patients with  
154         infectious pneumonia. Crit Care 16:R46.

155   5.     Matute-Bello G, Frevert CW, Martin TR. 2008. Animal models of acute lung injury. Am  
156         J Physiol Lung Cell Mol Physiol 295:L379-399.

157   6.     Giacalone VD, Margaroli C, Mall MA, Tirouvanziam R. 2020. Neutrophil adaptations  
158         upon recruitment to the lung: new concepts and implications for homeostasis and disease.  
159         Int J Mol Sci 21:851.

160   7.     Paukner S, Riedl R. 2017. Pleuromutilins: potent drugs for resistant bugs-mode of action  
161         and resistance. Cold Spring Harb Perspect Med 7:a027110.

162   8.     Xenleta™ (lefamulin). 2019. Full Prescribing Information, Nabriva Therapeutics US, Inc.,  
163         King of Prussia, PA.

164   9.     Sader HS, Paukner S, Ivezic-Schoenfeld Z, Biedenbach DJ, Schmitz FJ, Jones RN. 2012.  
165         Antimicrobial activity of the novel pleuromutilin antibiotic BC-3781 against organisms  
166         responsible for community-acquired respiratory tract infections (CARTIs). J Antimicrob  
167         Chemother 67:1170-1175.

168   10.    Paukner S, Sader HS, Ivezic-Schoenfeld Z, Jones RN. 2013. Antimicrobial activity of the  
169         pleuromutilin antibiotic BC-3781 against bacterial pathogens isolated in the SENTRY  
170         Antimicrobial Surveillance Program in 2010. Antimicrob Agents Chemother 57:4489-  
171         4495.

172   11.    Waites KB, Crabb DM, Duffy LB, Jensen JS, Liu Y, Paukner S. 2017. In vitro activities  
173         of lefamulin and other antimicrobial agents against macrolide-susceptible and macrolide-  
174         resistant *Mycoplasma pneumoniae* from the United States, Europe, and China.  
175         Antimicrob Agents Chemother 61(2):e02008-16.

12. Paukner S, Gelone SP, Arends SJR, Flamm RK, Sader HS. 2019. Antibacterial activity of lefamulin against pathogens most commonly causing community-acquired bacterial pneumonia: SENTRY antimicrobial surveillance program (2015-2016). *Antimicrob Agents Chemother* 63(4):e02161-18.
13. File TM, Jr, Goldberg L, Das A, Sweeney C, Saviski J, Gelone SP, Seltzer E, Paukner S, Wicha WW, Talbot GH, Gasink LB. 2019. Efficacy and safety of intravenous-to-oral lefamulin, a pleuromutilin antibiotic, for the treatment of community-acquired bacterial pneumonia: the phase III Lefamulin Evaluation Against Pneumonia (LEAP 1) trial. *Clin Infect Dis* 69:1856-1867.
14. Alexander E, Goldberg L, Das AF, Moran GJ, Sandrock C, Gasink LB, Spera P, Sweeney C, Paukner S, Wicha WW, Gelone SP, Schranz J. 2019. Oral lefamulin vs moxifloxacin for early clinical response among adults with community-acquired bacterial pneumonia: the LEAP 2 randomized clinical trial. *JAMA* 322:1661-1671.
15. Matthay MA, Ware LB, Zimmerman GA. 2012. The acute respiratory distress syndrome. *J Clin Invest* 122:2731-2740.
16. Wicha WW, Strickmann DB, Paukner S. 2019. Pharmacokinetics/pharmacodynamics of lefamulin in a neutropenic murine pneumonia model with *Staphylococcus aureus* and *Streptococcus pneumoniae*. *J Antimicrob Chemother* 74:iii11-iii18.
17. Zeitlinger M, Schwameis R, Burian A, Burian B, Matzneller P, Müller M, Wicha WW, Strickmann DB, Prince W. 2016. Simultaneous assessment of the pharmacokinetics of a pleuromutilin, lefamulin, in plasma, soft tissues and pulmonary epithelial lining fluid. *J Antimicrob Chemother* 71:1022-1026.
18. Bhavnani SM, Zhang L, Hammel JP, Rubino CM, Bader JC, Sader HS, Gelone SP, Wicha WW, Ambrose PG. 2019. Pharmacokinetic-pharmacodynamic target attainment analyses to support intravenous and oral lefamulin dose selection for the treatment of patients with community-acquired bacterial pneumonia. *J Antimicrob Chemother* 74:iii35-iii41.
19. Chen Z, Zhang X, Chu X, Zhang X, Song K, Jiang Y, Yu L, Deng X. 2010. Preventive effects of valnemulin on lipopolysaccharide-induced acute lung injury in mice. *Inflammation* 33:306-314.

20. Zhang X, Li H, Feng H, Xiong H, Zhang L, Song Y, Yu L, Deng X. 2009. Valnemulin downregulates nitric oxide, prostaglandin E2, and cytokine production via inhibition of NF-kappaB and MAPK activity. *Int Immunopharmacol* 9:810-816.

21. Zuo X, Fang X, Zhang Z, Jin Z, Xi G, Liu Y, Tang Y. 2020. Antibacterial activity and pharmacokinetic profile of a promising antibacterial agent: 22-(2-amino-phenylsulfanyl)-22-deoxypleuromutilin. *Molecules* 25:878.

22. Robbins R. 2018. Antibiotics as anti-inflammatories in pulmonary diseases. *Southwest J Pulm Crit Care* 17:97–107.

23. Zimmermann P, Ziesenitz VC, Curtis N, Ritz N. 2018. The immunomodulatory effects of macrolides—a systematic review of the underlying mechanisms. *Front Immunol* 9:302.

24. Bosnar M, Bošnjak B, Čužić S, Hrvačić B, Marjanović N, Glojnarić I, Čulić O, Parnham MJ, Eraković Haber V. 2009. Azithromycin and clarithromycin inhibit lipopolysaccharide-induced murine pulmonary neutrophilia mainly through effects on macrophage-derived granulocyte-macrophage colony-stimulating factor and interleukin-1beta. *J Pharmacol Exp Ther* 331:104-113.

**Figure.** (A) Total and (B) neutrophil cell counts in BALF after LPS induction.

BALF=bronchoalveolar lavage fluid; Dexa=dexamethasone; LPS=lipopolysaccharide; PO=oral;

SC=subcutaneous; SEM=standard error of the mean.

\**P*<0.05 vs LPS/vehicle via Mann-Whitney test.

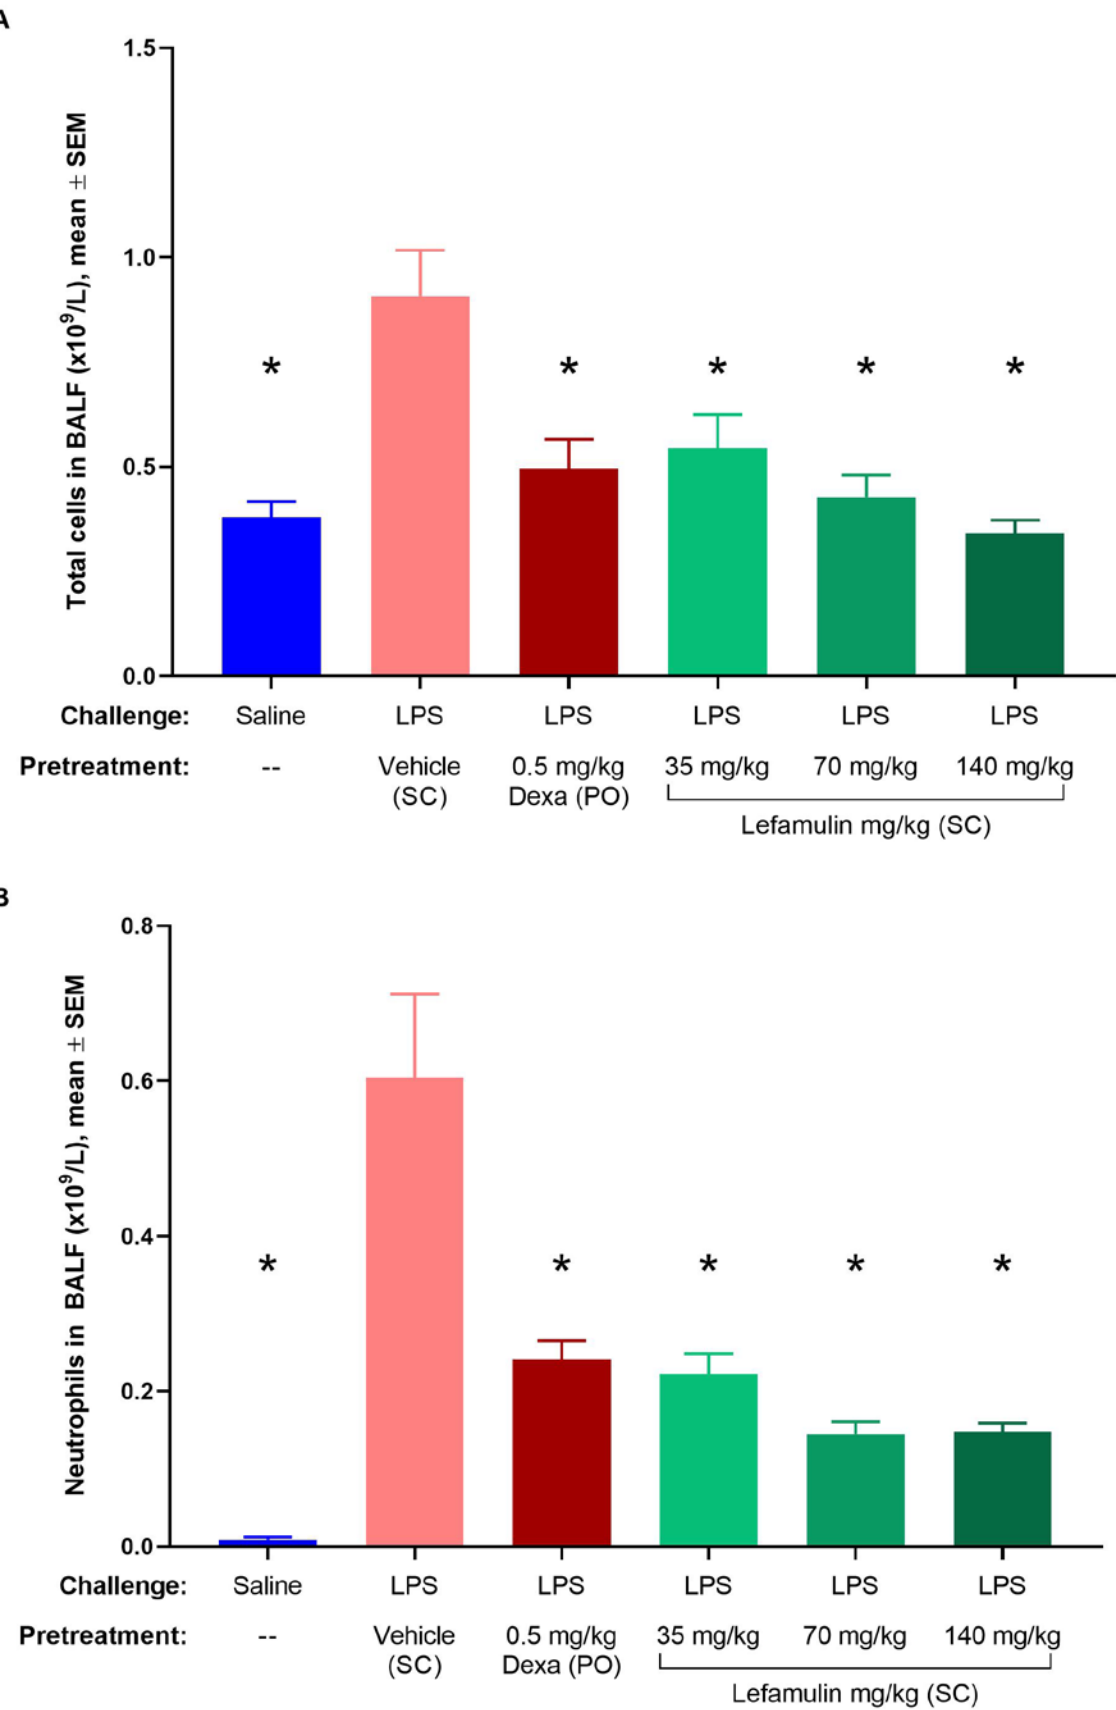

Source: https://www.biorxiv.org/content/10.1101/2020.06.23.168393v1.full.pdf
